# Supplementary material for: Balance Rehabilitation through Robot-Assisted Gait Training in Post-Stroke Patients: A Systematic Review and Meta-Analysis
Source: Brain Sci. 2023 Jan 3;13(1):92. doi: 10.3390/brainsci13010092 (PMC9856764; doi:10.3390/brainsci13010092)
Supplement: Supplementary file 1 [file brainsci-13-00092-s001.zip › Robotic Balance Final Database.xlsx]

## Sheet: BBS
AUTHOR	YEAR	PZ TREATED (INT/CONT)	DEVICE	TREATMENT APPLIED (EXPERIMENTAL VS. CONTROL)	WEEKS OF TREATMENT	SESSIONS PER WEEK	SINGLE SESSION DURATION	TIME FROM STROKE	BERG BALANCE SCALE
									PRE-TREATMENT			POST-TREATMENT
									INTER	CONTR	P-VALUE	INTER	CONTR	Δ INT	Δ CONT	P-VALUE
Wright	2021	34 (16/18)	Alter-G, Bionic Leg orthosis, Fremont, CA, USA	RAGT + conventional therapy VS. conventional therapy	10	7	N/A	> 3months; < 5 years	40.9 ± 9.6	43.3 ± 7.3	N/A	45.6 ± 9.1	43.6 ± 8.1	N/A	N/A	< 0.001
Kim	2015	26 (13/13)	WALKBOT (P&S Mechanics, Seoul, Korea)	RAGT + conventional therapy VS. conventional therapy	4	5	80 min	< 1 year	19.23 ± 14.62	19.77 ± 9.00	N/A	33.85 ± 12.92	27.00 ± 7.88	N/A	N/A	0.03
Kang	2021	30 (15/15)	SUBAR	RAGT VS. conventional therapy	3	3.33 (10 total)	30 min	6 months	48.3±2.7	47.3±4.9	N/A	48.5 ± 2.8	50.8 ± 2.5	0.1 ± 1.3	3.5 ± 4.6	0.004
Young Kim	2019	48 (25/23)	Morning Walk®	RAGT + conventional therapy VS. conventional therapy	3	5	90 min	< 1 year	25.5 ± 16.3	26.9 ± 14.8	N/A	39.8 ± 15.6	36.5 ± 14.8	16.7 ± 8.7 (PER FAC =2) 10.8 ± 8.7 (PER FAC > 2)	10.8 ± 10.5 (PER FAC =2) 8.4 ± 4.5 (PER FAC > 2)	0.047
Park, Chung	2018	28 (12/16)	Lokomat Pro, Hocoma AG, Zurich, Switzerland	Virtual reality + RAGT + conventional therapy VS. conventional therapy	6	5	45 min	≥ 6 months	40.50 ± 1.65	40.62 ± 1.99	N/A	50.16 ± 1.72	45.75 ± 1.91	9.66 ± 1.97	5.12 ± 1.50	< 0.001
Park, Chung	2018	28 (12/16)	Lokomat Pro, Hocoma AG, Zurich, Switzerland	Auditory stimulation + RAGT + conventional therapy VS. conventional therapy	6	5	45 min	≥ 6 months	40.41 ± 5.21	40.62 ± 1.99	N/A	48.16 ± 1.80	45.75 ± 1.91	7.75 ± 4.00	5.12 ± 1.50	< 0.001
Wall	2020	32 (16/16)	Hybrid Assistive Limb (HAL)	RAGT VS. conventional therapy	4	4	60 min	≤ 8 weeks	8 [5.25;12.75]	8 [5.25;14.75]	0.696	22 [10.25;40.25]	22.5 [11.5;35]	8.5 [6;31.75]	14 [4.25;20]	0.780
Yun	2018	36 (18/18)	Lokomat (Hocoma AG, Zurich, Switzerland)	RAGT VS. conventional therapy	3	5	30 min	< 3 months	4.1 ± 2.6	4.3 ± 2.4	N/A	11.1 ± 5.1	6.3 ± 2.5	+7.1	+1.9	<0.001
Yeung	2021	31 (14/17)	Dynamixel MX-106R, ROBOTIS, South Korea	RAGT (power-assisted) + conventional therapy VS. conventional therapy	10	2	30 min	≤ 2 months	24.0 ± 11.3	25.9 ± 14.4	N/A	N/A	N/A	+ 18.8 (+ 13.1, + 24.4)	+14.4 (+ 9.4, + 19.3)	> 0.05
Yeung	2021	33 (16/17)	Dynamixel MX-106R, ROBOTIS, South Korea	RAGT (swing-controlled) + conventional therapy VS. conventional therapy	10	2	30 min	≤ 2 months	30.7 ± 14.6	25.9 ± 14.4	N/A	N/A	N/A	+ 12.6 (+ 6.2, + 18.9)	+14.4 (+ 9.4, + 19.3)	> 0.05
Dos Santos	2018	15 (7/8)	Lokomat (Hocoma AG, Zurich, Switzerland)	RAGT + conventional therapy VS. conventional therapy	20	3	60 min	> 1 year	26.6 ± 18.0	27.3 ± 10.8	N/A	32.4 ± 18.8	35.5 ± 14.1	N/A	N/A	N/A
Nam	2020	38 (18/20)	Exowalk®	RAGT + conventional therapy VS. conventional therapy	2	5	60 min	> 3 months	36.39 ± 18.72	35.50 ± 12.75	N/A	39.28 ± 17.79	37.60 ± 12.50	2.89 ± 3.04	2.10 ± 2.19	0.363
Mustafaoglu	2019	30 (15/15)	Lokomat (Hocoma AG, Zurich, Switzerland)	RAGT VS. conventional therapy	6	5	45 min	≥ 3 months	34.6 ± 3.6	33.1 ± 3.4	N/A	42.9 ± 2.6	41.8 ± 3.7	8.2±2.3	8.7 ± 2.4	0.33
Mustafaoglu	2019	30 (15/15)	Lokomat (Hocoma AG, Zurich, Switzerland)	RAGT + conventional therapy VS. conventional therapy	6	5	45 min	≥ 3 months	36.6 ± 6.6	33.1 ± 3.4	N/A	47.7 ± 7.2	41.8 ± 3.7	14.1 ± 6.3	8.7 ± 2.4	0.001
Hidler	2009	63 (33/30)	Lokomat (Hocoma AG, Zurich, Switzerland)	RAGT VS. conventional therapy	8	3	90 min	< 6 months	36.7 ± 1.9	39.9 ± 2.0	N/A	N/A	N/A	6.0 ± 0.9	6.6 ± 1.0	0.67
Westlake	2009	16 (8/8)	Lokomat (Hocoma AG, Zurich, Switzerland)	RAGT VS. conventional therapy	4	3	60 min	> 6 months	46.9 ± 7.5	47.0 ± 7.0	N/A	48.3 ± 6.8	51.0 ± 5.4	N/A	N/A	N/A
Bang	2016	18 (9/9)	Lokomat (Hocoma AG, Zurich, Switzerland)	RAGT VS. conventional therapy	4	5	60 min	> 6 months	43.22 (2.54)	42.11 (2.42)	N/A	48.89 (2.37)	46.33 (1.87)	N/A	N/A	0.022
Gandolfi	2019	28 (14/14)	G-EO system device (Reha Technology, Olten, Switzerland)	RAGT VS. conventional therapy	5	2	50 min	≥ 6 months	45.33 (7.04)	44.27 (6.62)	0.67	48.80 (6.46)	48.27 (5.47)	N/A	N/A	0.81

## Sheet: TUG
AUTHOR	YEAR	PZ TREATED (INT/CONT)	DEVICE	TREATMENT APPLIED (EXPERIMENTAL VS. CONTROL)	WEEKS OF TREATMENT	SESSIONS PER WEEK	SINGLE SESSION DURATION	TIME FROM STROKE	TIME UP AND GO TEST
									PRE-TREATMENT			POST-TREATMENT
									INTER	CONTR	P-VALUE	INTER	CONTR	Δ INT	Δ CONT	P-VALUE
Wright	2021	34 (16/18)	Alter-G, Bionic Leg orthosis, Fremont, CA, USA	RAGT + conventional therapy VS. conventional therapy	10	7	N/A	> 3months; < 5 years	36.2 ± 20.2	36.0 ± 21.6	N/A	33.2 ± 21.8	31.5 ± 20.5	N/A	N/A	0.876
Yu	2021	54 (27/27)	Gait Training and Evaluation System A3 (NX, China)	RAGT VS. conventional therapy	2	7	120 min	< 12 weeks	23.4 (6.17)	26.8 (5.09)	N/A	21.31 (4.92)	22.43 (3.95)	N/A	N/A	0.28
Kang	2021	30 (15/15)	SUBAR	RAGT VS. conventional therapy	3	3.33 (10 total)	30 min	6 months	17.1 ± 6.9	17.3 ± 9.7	N/A	17.3 ± 4.9	15.1 ± 4.3	0.2 ± 3.2	- 2.1 ± 3.9	0.250
Park, Chung	2018	28 (12/16)	Lokomat Pro, Hocoma AG, Zurich, Switzerland	Virtual reality + RAGT + conventional therapy VS. conventional therapy	6	5	45 min	≥ 6 months	27.25 ± 2.31	26.06 ± 3.90	N/A	14.50 ± 2.81	19.43 ± 2.78	–12.75 ± 3.19	–6.62 ± 3.44	0.001
Park, Chung	2018	28 (12/16)	Lokomat Pro, Hocoma AG, Zurich, Switzerland	Auditory stimulation + RAGT + conventional therapy VS. conventional therapy	6	5	45 min	≥ 6 months	27.58 ± 5.71	26.06 ± 3.90	N/A	17.50 ± 4.44	19.43 ± 2.78	–10.08 ± 5.17	–6.62 ± 3.44	0.001
Alingh	2021	31 (16/15)	LOPES II	RAGT + conventional therapy VS. conventional therapy	6	4 (mean)	30 min	< 10 weeks	23.1 ± 15.0	19.5 ± 11.8	N/A	17.0 ± 14.4	14.1 ± 7.6	N/A	N/A	N/A
Dos Santos	2018	15 (7/8)	Lokomat (Hocoma AG, Zurich, Switzerland)	RAGT + conventional therapy VS. conventional therapy	20	3	60 min	≥ 1 year	22.0 ± 10.0	28. 0 ± 11.0	N/A	27.0 ± 17.0	46.0 ± 0.40	N/A	N/A	N/A
Mustafaoglu	2019	30 (15/15)	Lokomat (Hocoma AG, Zurich, Switzerland)	RAGT VS. conventional therapy	6	5	45 min	≥ 3 months	33.3 ± 8.3	36.3 ± 11.2	N/A	27.9 ± 7.2	30.3 ± 9.7	-5.3 ± 2.9	-6.0 ± 1.9	0.043
Mustafaoglu	2019	30 (15/15)	Lokomat (Hocoma AG, Zurich, Switzerland)	RAGT + conventional therapy VS. conventional therapy	6	5	45 min	≥ 3 months	35.6 ± 15.4	36.3 ± 11.2	N/A	23.7 ± 13.6	30.3 ± 9.7	-11.8 ± 5.3	-6.0 ± 1.9	< 0.001
Ogino	2020	29 (8/11)	Welwalk WW-1000	RAGT + conventional therapy VS. conventional therapy	4	5	60 min	> 6 months	19.77 ± 14.78	15.13 ± 7.36	N/A	16.67 ± 10.17	15.93 ± 9.06	3.09 (-0.24; 6.42)	0.79 (-0.72; 2.30)	0.013
Gandolfi	2019	28 (14/14)	G-EO system device (Reha Technology, Olten, Switzerland)	RAGT VS. conventional therapy	5	2	50 min	≥ 6 months	22.81 (8.65)	23.89 (8.50)	0.73	19.17 (8.14)	18.80 (6.74)	N/A	N/A	0.89
